# Supplementary material
Source: Research Square preprint supplement (doi:10.21203/rs.3.rs-9896868/v1)
Supplement: Supplementary file 1 [file e3ea11f4a1b17444bc263e6d.xlsx]

## Sheet: Sheet1
Table S1. Metadata for HTS data sets retrieved from public databases.
BioProject	Accession number	Tick species	Host origin	Collection date	Geographic location	Latitude and Longitude	Gender	Tick number	article
PRJNA841744	SRR19434713	Ixodes sp.	flagging at various sites	2019	China:Heilongjiang	NA	NA	10	Metavirome of 31 tick species provides a compendium of 1,801 RNA virus genomes
PRJNA841744	SRR19434643	Ixodes persulcatus	field -- flagging at various sites	2019	China:Jilin	NA	NA	25	Metavirome of 31 tick species provides a compendium of 1,801 RNA virus genomes
PRJNA841744	SRR19434644	Ixodes persulcatus	field -- flagging at various sites	2019	China:Jilin	NA	NA	11	Metavirome of 31 tick species provides a compendium of 1,801 RNA virus genomes
PRJNA841744	SRR19434645	Ixodes persulcatus	field -- flagging at various sites	2019	China:Heilongjiang	NA	NA	10	Metavirome of 31 tick species provides a compendium of 1,801 RNA virus genomes
PRJNA841744	SRR19434647	Ixodes persulcatus	field -- flagging at various sites	2019	China:Heilongjiang	NA	NA	10	Metavirome of 31 tick species provides a compendium of 1,801 RNA virus genomes
PRJNA841744	SRR19434648	Ixodes persulcatus	field -- flagging at various sites	2017	China:Heilongjiang	NA	NA	10	Metavirome of 31 tick species provides a compendium of 1,801 RNA virus genomes
PRJNA841744	SRR19434715	Haemaphysalis concinna	field -- flagging at various sites	2019	China:Jilin	NA	NA	11	Metavirome of 31 tick species provides a compendium of 1,801 RNA virus genomes
PRJNA841744	SRR19434716	Haemaphysalis sp.	field -- flagging at various sites	2019	China:Jilin	NA	NA	11	Metavirome of 31 tick species provides a compendium of 1,801 RNA virus genomes
PRJNA841744	SRR19434717	Haemaphysalis concinna	field -- flagging at various sites	2019	China:Jilin	NA	NA	11	Metavirome of 31 tick species provides a compendium of 1,801 RNA virus genomes
PRJNA841744	SRR19434725	Dermacentor silvarum	field -- flagging at various sites	2019	China:Jilin	NA	NA	6	Metavirome of 31 tick species provides a compendium of 1,801 RNA virus genomes
PRJNA841744	SRR19434726	Dermacentor sp.	field -- flagging at various sites	2019	China:Jilin	NA	NA	6	Metavirome of 31 tick species provides a compendium of 1,801 RNA virus genomes
PRJNA841744	SRR19434727	Dermacentor silvarum	field -- flagging at various sites	2019	China:Jilin	NA	NA	6	Metavirome of 31 tick species provides a compendium of 1,801 RNA virus genomes
PRJNA841744	SRR19434729	Dermacentor silvarum	field -- flagging at various sites	2019	China:Heilongjiang	NA	NA	5	Metavirome of 31 tick species provides a compendium of 1,801 RNA virus genomes
PRJNA841744	SRR19434731	Dermacentor silvarum	field -- flagging at various sites	2019	China:Heilongjiang	NA	NA	7	Metavirome of 31 tick species provides a compendium of 1,801 RNA virus genomes
PRJNA841744	SRR19434732	Dermacentor silvarum	field -- flagging at various sites	2019	China:Heilongjiang	NA	NA	6	Metavirome of 31 tick species provides a compendium of 1,801 RNA virus genomes
PRJNA841744	SRR19434733	Dermacentor silvarum	field -- flagging at various sites	2019	China:Heilongjiang	NA	NA	NA	Metavirome of 31 tick species provides a compendium of 1,801 RNA virus genomes
PRJNA841744	SRR19434734	Dermacentor silvarum	field -- flagging at various sites	2019	China:Heilongjiang	NA	NA	6	Metavirome of 31 tick species provides a compendium of 1,801 RNA virus genomes
PRJNA841744	SRR19434736	Dermacentor silvarum	field -- flagging at various sites	2019	China:Heilongjiang	NA	NA	10	Metavirome of 31 tick species provides a compendium of 1,801 RNA virus genomes
PRJNA841744	SRR19434738	Dermacentor silvarum	field -- flagging at various sites	2019	China:Heilongjiang	NA	NA	10
PRJNA841744	SRR19434739	Dermacentor silvarum	field -- flagging at various sites	2019	China:Heilongjiang	NA	NA	6	Metavirome of 31 tick species provides a compendium of 1,801 RNA virus genomes
PRJNA841744	SRR19434743	Dermacentor silvarum	field -- flagging at various sites	2018	China:Inner_Mongolia	NA	NA	NA	Metavirome of 31 tick species provides a compendium of 1,801 RNA virus genomes
PRJNA841744	SRR19434646	Dermacentor silvarum	field -- flagging at various sites	2018	China:Inner_Mongolia	NA	NA	NA	Metavirome of 31 tick species provides a compendium of 1,801 RNA virus genomes
PRJNA841744	SRR19434668	Dermacentor silvarum	field -- flagging at various sites	2018	China:Inner_Mongolia	NA	NA	NA	Metavirome of 31 tick species provides a compendium of 1,801 RNA virus genomes
PRJNA841744	SRR19434679	Dermacentor sp.	field -- flagging at various sites	2018	China:Inner_Mongolia	NA	NA	6	Metavirome of 31 tick species provides a compendium of 1,801 RNA virus genomes
PRJNA841744	SRR19434690	Dermacentor silvarum	field -- flagging at various sites	2018	China:Inner_Mongolia	NA	NA	6	Metavirome of 31 tick species provides a compendium of 1,801 RNA virus genomes
PRJNA841744	SRR19434701	Dermacentor silvarum	field -- flagging at various sites	2018	China:Inner_Mongolia	NA	NA	6	Metavirome of 31 tick species provides a compendium of 1,801 RNA virus genomes
PRJNA841744	SRR19434719	Dermacentor silvarum	field -- flagging at various sites	2017	China:Inner_Mongolia	NA	NA	6	Metavirome of 31 tick species provides a compendium of 1,801 RNA virus genomes
PRJNA841744	SRR19434730	Dermacentor silvarum	field -- flagging at various sites	2017	China:Inner_Mongolia	NA	NA	6	Metavirome of 31 tick species provides a compendium of 1,801 RNA virus genomes
PRJNA841744	SRR19434744	Dermacentor silvarum	field -- flagging at various sites	2019	China:Heilongjiang	NA	NA	10	Metavirome of 31 tick species provides a compendium of 1,801 RNA virus genomes
PRJNA841744	SRR19434745	Dermacentor nuttalli	field -- flagging at various sites	2019	China:Heilongjiang	NA	NA	10	Metavirome of 31 tick species provides a compendium of 1,801 RNA virus genomes
PRJNA841744	SRR19429867	Dermacentor silvarum	field -- flagging at various sites	2017	China:Inner_Mongolia	NA	NA	6	Metavirome of 31 tick species provides a compendium of 1,801 RNA virus genomes
PRJNA841744	SRR19429869	Dermacentor silvarum	field -- flagging at various sites	2018	China:Inner_Mongolia	NA	NA	6	Metavirome of 31 tick species provides a compendium of 1,801 RNA virus genomes
PRJNA841744	SRR19429870	Haemaphysalis longicornis	sheep	2018	China:Liaoning	40.79 N 124.93 E	NA	30	Metavirome of 31 tick species provides a compendium of 1,801 RNA virus genomes
PRJNA841744	SRR19429871	Haemaphysalis longicornis	field -- flagging at various sites	2018	China:Liaoning	41.24 N 119.41 E	NA	20	Metavirome of 31 tick species provides a compendium of 1,801 RNA virus genomes
PRJNA841744	SRR19429873	Ixodes persulcatus	field -- flagging at various sites	2019	China:Jilin	NA	NA	25	Metavirome of 31 tick species provides a compendium of 1,801 RNA virus genomes
PRJNA841744	SRR19429874	Ixodes persulcatus	field -- flagging at various sites	2019	China:Jilin	NA	NA	11	Metavirome of 31 tick species provides a compendium of 1,801 RNA virus genomes
PRJNA841744	SRR19429875	Haemaphysalis concinna	field -- flagging at various sites	2019	China:Jilin	NA	NA	11	Metavirome of 31 tick species provides a compendium of 1,801 RNA virus genomes
PRJNA841744	SRR19429876	Dermacentor silvarum	field -- flagging at various sites	2019	China:Jilin	NA	NA	6	Metavirome of 31 tick species provides a compendium of 1,801 RNA virus genomes
PRJNA841744	SRR19429885	Ixodes persulcatus	field -- flagging at various sites	2019	China:Heilongjiang	NA	NA	10	Metavirome of 31 tick species provides a compendium of 1,801 RNA virus genomes
PRJNA841744	SRR19429887	Dermacentor silvarum	field -- flagging at various sites	2019	China:Heilongjiang	NA	NA	7	Metavirome of 31 tick species provides a compendium of 1,801 RNA virus genomes
PRJNA841744	SRR19429888	Dermacentor silvarum	field -- flagging at various sites	2019	China:Heilongjiang	NA	NA	5	Metavirome of 31 tick species provides a compendium of 1,801 RNA virus genomes
PRJNA841744	SRR19429891	Dermacentor silvarum	field -- flagging at various sites	2019	China:Heilongjiang	NA	NA	6	Metavirome of 31 tick species provides a compendium of 1,801 RNA virus genomes
PRJNA841744	SRR19426775	Dermacentor silvarum	field -- flagging at various sites	1905	China:Inner_Mongolia	NA	NA	6	Metavirome of 31 tick species provides a compendium of 1,801 RNA virus genomes
PRJNA841744	SRR19426776	Dermacentor silvarum	field -- flagging at various sites	2018	China:Inner_Mongolia	NA	NA	5	Metavirome of 31 tick species provides a compendium of 1,801 RNA virus genomes
PRJNA841744	SRR19426777	Dermacentor silvarum	field -- flagging at various sites	2018	China:Inner_Mongolia	NA	NA	6	Metavirome of 31 tick species provides a compendium of 1,801 RNA virus genomes
PRJNA841744	SRR19426778	Dermacentor silvarum	sheep	2018	China:Inner_Mongolia	NA	NA	6	Metavirome of 31 tick species provides a compendium of 1,801 RNA virus genomes
PRJNA841744	SRR19426782	Haemaphysalis longicornis	sheep	2018	China:Liaoning	40.79 N 124.93 E	NA	30	Metavirome of 31 tick species provides a compendium of 1,801 RNA virus genomes
PRJNA841744	SRR19426816	Haemaphysalis longicornis	field -- flagging at various sites	2018	China:Liaoning	41.15 N 119.40 E	NA	20	Metavirome of 31 tick species provides a compendium of 1,801 RNA virus genomes
PRJNA841744	SRR19426817	Haemaphysalis longicornis	field -- flagging at various sites	2018	China:Liaoning	41.15 N 119.40 E	NA	15	Metavirome of 31 tick species provides a compendium of 1,801 RNA virus genomes
PRJNA841744	SRR19426820	Ixodes persulcatus	field -- flagging at various sites	2019	China:Jilin	NA	NA	25	Metavirome of 31 tick species provides a compendium of 1,801 RNA virus genomes
PRJNA841744	SRR19426821	Ixodes persulcatus	field -- flagging at various sites	2019	China:Jilin	NA	NA	13	Metavirome of 31 tick species provides a compendium of 1,801 RNA virus genomes
PRJNA841744	SRR19426823	Ixodes persulcatus	field -- flagging at various sites	2019	China:Jilin	NA	NA	11	Metavirome of 31 tick species provides a compendium of 1,801 RNA virus genomes
PRJNA841744	SRR19426824	Haemaphysalis longicornis	field -- flagging at various sites	2019	China:Jilin	41.72 N 125.93 E	NA	12	Metavirome of 31 tick species provides a compendium of 1,801 RNA virus genomes
PRJNA841744	SRR19426825	Haemaphysalis longicornis	field -- flagging at various sites	2019	China:Jilin	41.43 N 125.70 E	NA	20	Metavirome of 31 tick species provides a compendium of 1,801 RNA virus genomes
PRJNA841744	SRR19426826	Haemaphysalis japonica	field -- flagging at various sites	2019	China:Jilin	NA	NA	20	Metavirome of 31 tick species provides a compendium of 1,801 RNA virus genomes
PRJNA841744	SRR19426827	Haemaphysalis concinna	field -- flagging at various sites	2019	China:Jilin	NA	NA	12	Metavirome of 31 tick species provides a compendium of 1,801 RNA virus genomes
PRJNA841744	SRR19426828	Haemaphysalis concinna	field -- flagging at various sites	2019	China:Jilin	NA	NA	5	Metavirome of 31 tick species provides a compendium of 1,801 RNA virus genomes
PRJNA841744	SRR19426829	Haemaphysalis concinna	field -- flagging at various sites	2019	China:Jilin	NA	NA	15	Metavirome of 31 tick species provides a compendium of 1,801 RNA virus genomes
PRJNA841744	SRR19426830	Haemaphysalis concinna	field -- flagging at various sites	2019	China:Jilin	NA	NA	11	Metavirome of 31 tick species provides a compendium of 1,801 RNA virus genomes
PRJNA841744	SRR19426831	Dermacentor silvarum	field -- flagging at various sites	2019	China:Jilin	NA	NA	6	Metavirome of 31 tick species provides a compendium of 1,801 RNA virus genomes
PRJNA841744	SRR19426845	Ixodes persulcatus	field -- flagging at various sites	2019	China:Heilongjiang	NA	NA	10	Metavirome of 31 tick species provides a compendium of 1,801 RNA virus genomes
PRJNA841744	SRR19426783	Haemaphysalis japonica	field -- flagging at various sites	2019	China:Heilongjiang	NA	NA	10	Metavirome of 31 tick species provides a compendium of 1,801 RNA virus genomes
PRJNA841744	SRR19426784	Dermacentor silvarum	field -- flagging at various sites	2019	China:Heilongjiang	NA	NA	10	Metavirome of 31 tick species provides a compendium of 1,801 RNA virus genomes
PRJNA841744	SRR19426785	Dermacentor silvarum	field -- flagging at various sites	2019	China:Heilongjiang	NA	NA	7	Metavirome of 31 tick species provides a compendium of 1,801 RNA virus genomes
PRJNA841744	SRR19426786	Dermacentor silvarum	field -- flagging at various sites	2019	China:Heilongjiang	NA	NA	8	Metavirome of 31 tick species provides a compendium of 1,801 RNA virus genomes
PRJNA841744	SRR19426787	Dermacentor nuttalli	field -- flagging at various sites	2019	China:Heilongjiang	NA	NA	10	Metavirome of 31 tick species provides a compendium of 1,801 RNA virus genomes
PRJNA841744	SRR19426788	Dermacentor silvarum	field -- flagging at various sites	2019	China:Heilongjiang	NA	NA	6	Metavirome of 31 tick species provides a compendium of 1,801 RNA virus genomes
PRJNA841744	SRR19411307	Haemaphysalis concinna	field -- flagging at various sites	1905	China:Inner_Mongolia	NA	NA	15	Metavirome of 31 tick species provides a compendium of 1,801 RNA virus genomes
PRJNA841744	SRR19411311	Dermacentor silvarum	field -- flagging at various sites	1905	China:Inner_Mongolia	NA	NA	10	Metavirome of 31 tick species provides a compendium of 1,801 RNA virus genomes
PRJNA841744	SRR19411312	Dermacentor silvarum	field -- flagging at various sites	1905	China:Inner_Mongolia	NA	NA	6	Metavirome of 31 tick species provides a compendium of 1,801 RNA virus genomes
PRJNA841744	SRR19411313	Dermacentor silvarum	field -- flagging at various sites	2018	China:Inner_Mongolia	NA	NA	5	Metavirome of 31 tick species provides a compendium of 1,801 RNA virus genomes
PRJNA841744	SRR19411314	Dermacentor silvarum	field -- flagging at various sites	2018	China:Inner_Mongolia	NA	NA	6	Metavirome of 31 tick species provides a compendium of 1,801 RNA virus genomes
PRJNA841744	SRR19411315	Dermacentor silvarum	sheep	2018	China:Inner_Mongolia	NA	NA	7	Metavirome of 31 tick species provides a compendium of 1,801 RNA virus genomes
PRJNA841744	SRR19411316	Dermacentor silvarum	sheep	2018	China:Inner_Mongolia	NA	NA	6	Metavirome of 31 tick species provides a compendium of 1,801 RNA virus genomes
PRJNA841744	SRR19411322	Haemaphysalis longicornis	field -- flagging at various sites	2018	China:Liaoning	41.10 N 122.99 E	NA	10	Metavirome of 31 tick species provides a compendium of 1,801 RNA virus genomes
PRJNA841744	SRR19426779	Haemaphysalis longicornis	field -- flagging at various sites	2018	China:Liaoning	41.10 N 122.99 E	NA	10	Metavirome of 31 tick species provides a compendium of 1,801 RNA virus genomes
PRJNA841744	SRR19411319	Haemaphysalis longicornis	sheep	2018	China:Liaoning	40.79 N 124.93 E	NA	5	Metavirome of 31 tick species provides a compendium of 1,801 RNA virus genomes
PRJNA841744	SRR19411318	Haemaphysalis longicornis	goat	2018	China:Liaoning	40.66 N 122.23 E	NA	5	Metavirome of 31 tick species provides a compendium of 1,801 RNA virus genomes
PRJNA841744	SRR19411320	Haemaphysalis longicornis	sheep	2018	China:Liaoning	40.08 N 123.09 E	NA	7	Metavirome of 31 tick species provides a compendium of 1,801 RNA virus genomes
PRJNA841744	SRR19411321	Haemaphysalis longicornis	sheep	2018	China:Liaoning	40.08 N 123.09 E	NA	10	Metavirome of 31 tick species provides a compendium of 1,801 RNA virus genomes
PRJNA841744	SRR19411323	Haemaphysalis longicornis	sheep	2018	China:Liaoning	40.08 N 123.09 E	NA	25	Metavirome of 31 tick species provides a compendium of 1,801 RNA virus genomes
PRJNA841744	SRR19411326	Haemaphysalis longicornis	sheep	2018	China:Liaoning	40.08 N 123.09 E	NA	16	Metavirome of 31 tick species provides a compendium of 1,801 RNA virus genomes
PRJNA841744	SRR19426781	Haemaphysalis longicornis	sheep	2018	China:Liaoning	40.79 N 124.93 E	NA	16	Metavirome of 31 tick species provides a compendium of 1,801 RNA virus genomes
PRJNA841744	SRR19411324	Haemaphysalis longicornis	dog	2018	China:Liaoning	40.79 N 124.93 E	NA	30	Metavirome of 31 tick species provides a compendium of 1,801 RNA virus genomes
PRJNA841744	SRR19411325	Haemaphysalis longicornis	sheep	1905	China:Liaoning	40.79 N 124.93 E	NA	10	Metavirome of 31 tick species provides a compendium of 1,801 RNA virus genomes
PRJNA841744	SRR19411327	Haemaphysalis longicornis	sheep	2018	China:Liaoning	40.79 N 124.93 E	NA	30	Metavirome of 31 tick species provides a compendium of 1,801 RNA virus genomes
PRJNA841744	SRR19411361	Haemaphysalis longicornis	sheep	2018	China:Liaoning	40.79 N 124.93 E	NA	23	Metavirome of 31 tick species provides a compendium of 1,801 RNA virus genomes
PRJNA841744	SRR19411362	Haemaphysalis longicornis	sheep	2018	China:Liaoning	40.79 N 124.93 E	NA	20	Metavirome of 31 tick species provides a compendium of 1,801 RNA virus genomes
PRJNA841744	SRR19411363	Haemaphysalis longicornis	sheep	2018	China:Liaoning	40.79 N 124.93 E	NA	15	Metavirome of 31 tick species provides a compendium of 1,801 RNA virus genomes
PRJNA841744	SRR19411364	Haemaphysalis longicornis	cattle	2017	China:Liaoning	40.08 N 123.09 E	NA	25	Metavirome of 31 tick species provides a compendium of 1,801 RNA virus genomes
PRJNA841744	SRR19411365	Haemaphysalis longicornis	field -- flagging at various sites	2018	China:Liaoning	38.84 N 121.25 E	NA	14	Metavirome of 31 tick species provides a compendium of 1,801 RNA virus genomes
PRJNA841744	SRR19426814	Haemaphysalis longicornis	field -- flagging at various sites	2018	China:Liaoning	38.84 N 121.25 E	NA	14	Metavirome of 31 tick species provides a compendium of 1,801 RNA virus genomes
PRJNA841744	SRR19426815	Haemaphysalis longicornis	field -- flagging at various sites	2018	China:Liaoning	41.24 N 119.41 E	NA	17	Metavirome of 31 tick species provides a compendium of 1,801 RNA virus genomes
PRJNA841744	SRR19411366	Haemaphysalis longicornis	field -- flagging at various sites	2018	China:Liaoning	41.24 N 119.41 E	NA	17	Metavirome of 31 tick species provides a compendium of 1,801 RNA virus genomes
PRJNA841744	SRR19411367	Haemaphysalis longicornis	field -- flagging at various sites	2017	China:Liaoning	41.24 N 119.41 E	NA	17	Metavirome of 31 tick species provides a compendium of 1,801 RNA virus genomes
PRJNA841744	SRR19411368	Haemaphysalis longicornis	field -- flagging at various sites	2017	China:Liaoning	38.84 N 121.25 E	NA	14	Metavirome of 31 tick species provides a compendium of 1,801 RNA virus genomes
PRJNA841744	SRR19411369	Haemaphysalis longicornis	field -- flagging at various sites	2018	China:Liaoning	41.15 N 119.40 E	NA	20	Metavirome of 31 tick species provides a compendium of 1,801 RNA virus genomes
PRJNA841744	SRR19411370	Haemaphysalis longicornis	field -- flagging at various sites	2018	China:Liaoning	41.15 N 119.40 E	NA	15	Metavirome of 31 tick species provides a compendium of 1,801 RNA virus genomes
PRJNA841744	SRR19411386	Ixodes persulcatus	field -- flagging at various sites	2019	China:Jilin	NA	NA	7	Metavirome of 31 tick species provides a compendium of 1,801 RNA virus genomes
PRJNA841744	SRR19411387	Ixodes persulcatus	field -- flagging at various sites	2019	China:Jilin	NA	NA	10	Metavirome of 31 tick species provides a compendium of 1,801 RNA virus genomes
PRJNA841744	SRR19411388	Ixodes persulcatus	field -- flagging at various sites	2019	China:Jilin	NA	NA	13	Metavirome of 31 tick species provides a compendium of 1,801 RNA virus genomes
PRJNA841744	SRR19411389	Ixodes persulcatus	field -- flagging at various sites	2019	China:Jilin	NA	NA	28	Metavirome of 31 tick species provides a compendium of 1,801 RNA virus genomes
PRJNA841744	SRR19411390	Ixodes persulcatus	field -- flagging at various sites	2019	China:Jilin	NA	NA	25	Metavirome of 31 tick species provides a compendium of 1,801 RNA virus genomes
PRJNA841744	SRR19411391	Ixodes persulcatus	cat	2019	China:Jilin	NA	NA	5	Metavirome of 31 tick species provides a compendium of 1,801 RNA virus genomes
PRJNA841744	SRR19411392	Ixodes persulcatus	field -- flagging at various sites	2019	China:Jilin	NA	NA	18	Metavirome of 31 tick species provides a compendium of 1,801 RNA virus genomes
PRJNA841744	SRR19411458	Ixodes persulcatus	field -- flagging at various sites	2019	China:Jilin	NA	NA	11	Metavirome of 31 tick species provides a compendium of 1,801 RNA virus genomes
PRJNA841744	SRR19411459	Haemaphysalis longicornis	field -- flagging at various sites	2019	China:Jilin	41.72 N 125.93 E	NA	29	Metavirome of 31 tick species provides a compendium of 1,801 RNA virus genomes
PRJNA841744	SRR19411460	Haemaphysalis longicornis	field -- flagging at various sites	2019	China:Jilin	41.72 N 125.93 E	NA	14	Metavirome of 31 tick species provides a compendium of 1,801 RNA virus genomes
PRJNA841744	SRR19411461	Haemaphysalis longicornis	field -- flagging at various sites	2019	China:Jilin	41.43 N 125.70 E	NA	20	Metavirome of 31 tick species provides a compendium of 1,801 RNA virus genomes
PRJNA841744	SRR19411462	Haemaphysalis longicornis	field -- flagging at various sites	2019	China:Jilin	41.43 N 125.70 E	NA	12	Metavirome of 31 tick species provides a compendium of 1,801 RNA virus genomes
PRJNA841744	SRR19411463	Haemaphysalis japonica	field -- flagging at various sites	2019	China:Jilin	NA	NA	15	Metavirome of 31 tick species provides a compendium of 1,801 RNA virus genomes
PRJNA841744	SRR19411464	Haemaphysalis japonica	field -- flagging at various sites	2019	China:Jilin	NA	NA	20	Metavirome of 31 tick species provides a compendium of 1,801 RNA virus genomes
PRJNA841744	SRR19411469	Haemaphysalis concinna	goat	2019	China:Jilin	NA	NA	17	Metavirome of 31 tick species provides a compendium of 1,801 RNA virus genomes
PRJNA841744	SRR19411470	Haemaphysalis concinna	goat	2019	China:Jilin	NA	NA	16	Metavirome of 31 tick species provides a compendium of 1,801 RNA virus genomes
PRJNA841744	SRR19411471	Haemaphysalis concinna	goat	2017	China:Jilin	NA	NA	16	Metavirome of 31 tick species provides a compendium of 1,801 RNA virus genomes
PRJNA841744	SRR19411472	Haemaphysalis concinna	goat	2019	China:Jilin	NA	NA	15	Metavirome of 31 tick species provides a compendium of 1,801 RNA virus genomes
PRJNA841744	SRR19411473	Haemaphysalis concinna	field -- flagging at various sites	2019	China:Jilin	NA	NA	15	Metavirome of 31 tick species provides a compendium of 1,801 RNA virus genomes
PRJNA841744	SRR19411474	Haemaphysalis concinna	field -- flagging at various sites	2019	China:Jilin	NA	NA	21	Metavirome of 31 tick species provides a compendium of 1,801 RNA virus genomes
PRJNA841744	SRR19411476	Haemaphysalis concinna	field -- flagging at various sites	2018	China:Jilin	NA	NA	25	Metavirome of 31 tick species provides a compendium of 1,801 RNA virus genomes
PRJNA841744	SRR19411477	Haemaphysalis concinna	field -- flagging at various sites	2019	China:Jilin	NA	NA	18	Metavirome of 31 tick species provides a compendium of 1,801 RNA virus genomes
PRJNA841744	SRR19411478	Haemaphysalis concinna	field -- flagging at various sites	2019	China:Jilin	NA	NA	11	Metavirome of 31 tick species provides a compendium of 1,801 RNA virus genomes
PRJNA841744	SRR19411480	Dermacentor silvarum	sheep	2019	China:Jilin:Dunhua:Jiangyuanzhen	43.16 N 127.97 E	NA	5	Metavirome of 31 tick species provides a compendium of 1,801 RNA virus genomes
PRJNA841744	SRR19411481	Dermacentor silvarum	field -- flagging at various sites	2018	China:Jilin	NA	NA	6	Metavirome of 31 tick species provides a compendium of 1,801 RNA virus genomes
PRJNA841744	SRR19411482	Dermacentor silvarum	field -- flagging at various sites	2019	China:Jilin	NA	NA	6	Metavirome of 31 tick species provides a compendium of 1,801 RNA virus genomes
PRJNA841744	SRR19411512	Ixodes persulcatus	field -- flagging at various sites	2019	China:Heilongjiang	NA	NA	29	Metavirome of 31 tick species provides a compendium of 1,801 RNA virus genomes
PRJNA841744	SRR19411513	Ixodes persulcatus	field -- flagging at various sites	2019	China:Heilongjiang	NA	NA	11	Metavirome of 31 tick species provides a compendium of 1,801 RNA virus genomes
PRJNA841744	SRR19411514	Ixodes persulcatus	field -- flagging at various sites	2019	China:Heilongjiang	NA	NA	10	Metavirome of 31 tick species provides a compendium of 1,801 RNA virus genomes
PRJNA841744	SRR19411515	Ixodes persulcatus	field -- flagging at various sites	2019	China:Heilongjiang	NA	NA	13	Metavirome of 31 tick species provides a compendium of 1,801 RNA virus genomes
PRJNA841744	SRR19411516	Haemaphysalis japonica	field -- flagging at various sites	2019	China:Heilongjiang	NA	NA	10	Metavirome of 31 tick species provides a compendium of 1,801 RNA virus genomes
PRJNA841744	SRR19411517	Dermacentor silvarum	field -- flagging at various sites	2019	China:Heilongjiang	NA	NA	7	Metavirome of 31 tick species provides a compendium of 1,801 RNA virus genomes
PRJNA841744	SRR19411329	Dermacentor silvarum	field -- flagging at various sites	2019	China:Heilongjiang	NA	NA	5	Metavirome of 31 tick species provides a compendium of 1,801 RNA virus genomes
PRJNA841744	SRR19411330	Dermacentor nuttalli	field -- flagging at various sites	2019	China:Heilongjiang	NA	NA	10	Metavirome of 31 tick species provides a compendium of 1,801 RNA virus genomes
PRJNA841744	SRR19411331	Ixodes persulcatus	field -- flagging at various sites	2019	China:Heilongjiang	NA	NA	15	Metavirome of 31 tick species provides a compendium of 1,801 RNA virus genomes
PRJNA841744	SRR19411333	Ixodes persulcatus	field -- flagging at various sites	2019	China:Heilongjiang	NA	NA	30	Metavirome of 31 tick species provides a compendium of 1,801 RNA virus genomes
PRJNA841744	SRR19411334	Haemaphysalis japonica	field -- flagging at various sites	2019	China:Heilongjiang	NA	NA	30	Metavirome of 31 tick species provides a compendium of 1,801 RNA virus genomes
PRJNA841744	SRR19411335	Dermacentor silvarum	field -- flagging at various sites	2019	China:Heilongjiang	NA	NA	8	Metavirome of 31 tick species provides a compendium of 1,801 RNA virus genomes
PRJNA841744	SRR19411336	Dermacentor silvarum	field -- flagging at various sites	2019	China:Heilongjiang	NA	NA	12	Metavirome of 31 tick species provides a compendium of 1,801 RNA virus genomes
PRJNA841744	SRR19411337	Dermacentor silvarum	field -- flagging at various sites	2019	China:Heilongjiang	NA	NA	10	Metavirome of 31 tick species provides a compendium of 1,801 RNA virus genomes
PRJNA841744	SRR19411338	Dermacentor silvarum	field -- flagging at various sites	2019	China:Heilongjiang	NA	NA	6	Metavirome of 31 tick species provides a compendium of 1,801 RNA virus genomes
PRJNA432323	SRR6659068	Mixed	field -- flagging at various sites	2016	China:Heilongjiang	NA	NA	NA	Virome analysis of tick-borne viruses in Heilongjiang Province, China
PRJNA880639	SRR21617168	Ixodes persulcatus	field -- flagging at various sites	2020	China:Jilin:Dunhua	43.39 N 128.19 E	NA	192	Extensive diversity of RNA viruses in ticks revealed by metagenomics in northeastern China
PRJNA880639	SRR21617169	Dermacentor silvarum	field -- flagging at various sites	2020	China:Jilin:Dunhua	43.39 N 128.19 E	NA	86	Extensive diversity of RNA viruses in ticks revealed by metagenomics in northeastern China
PRJNA880639	SRR21617170	Haemaphysalis japonica	field -- flagging at various sites	2020	China:Jilin:Dunhua	43.39 N 128.19 E	NA	104	Extensive diversity of RNA viruses in ticks revealed by metagenomics in northeastern China
PRJNA880639	SRR21617171	Ixodes persulcatus	field -- flagging at various sites	2021	China:Heilongjiang:Yichun	47.37 N 128.98 E	Female	100	Extensive diversity of RNA viruses in ticks revealed by metagenomics in northeastern China
PRJNA880639	SRR21617173	Ixodes persulcatus	field -- flagging at various sites	2021	China:Heilongjiang:Yichun	47.37 N 128.98 E	Male	100	Extensive diversity of RNA viruses in ticks revealed by metagenomics in northeastern China
PRJNA880639	SRR21617174	Ixodes persulcatus	field -- flagging at various sites	2021	China:Heilongjiang:Tahe	52.33 N 124.70 E	Female	100	Extensive diversity of RNA viruses in ticks revealed by metagenomics in northeastern China
PRJNA880639	SRR21617175	Ixodes persulcatus	field -- flagging at various sites	2021	China:Heilongjiang:Tahe	52.33 N 124.70 E	Male	100	Extensive diversity of RNA viruses in ticks revealed by metagenomics in northeastern China
PRJNA880639	SRR21617176	Ixodes persulcatus	field -- flagging at various sites	2021	China:Heilongjiang:Songling	50.91 N 124.41 E	Female	100	Extensive diversity of RNA viruses in ticks revealed by metagenomics in northeastern China
PRJNA880639	SRR21617177	Ixodes persulcatus	field -- flagging at various sites	2021	China:Heilongjiang:Songling	50.91 N 124.41 E	Male	100	Extensive diversity of RNA viruses in ticks revealed by metagenomics in northeastern China
PRJNA880639	SRR21617178	Haemaphysalis concinna	field -- flagging at various sites	2021	China:Heilongjiang:Yichun	47.37 N 128.98 E	Female	23	Extensive diversity of RNA viruses in ticks revealed by metagenomics in northeastern China
PRJNA880639	SRR21617179	Haemaphysalis concinna	field -- flagging at various sites	2021	China:Heilongjiang:Yichun	47.37 N 128.98 E	Male	30	Extensive diversity of RNA viruses in ticks revealed by metagenomics in northeastern China
PRJNA880639	SRR21617180	Haemaphysalis concinna	field -- flagging at various sites	2021	China:Heilongjiang:Tahe	52.33 N 124.70 E	Female	63	Extensive diversity of RNA viruses in ticks revealed by metagenomics in northeastern China
PRJNA880639	SRR21617181	Haemaphysalis concinna	field -- flagging at various sites	2021	China:Heilongjiang:Tahe	52.33 N 124.70 E	Male	53	Extensive diversity of RNA viruses in ticks revealed by metagenomics in northeastern China
PRJNA880639	SRR21617182	Haemaphysalis concinna	field -- flagging at various sites	2021	China:Heilongjiang:Songling	50.91 N 124.41 E	Female	10	Extensive diversity of RNA viruses in ticks revealed by metagenomics in northeastern China
PRJNA880639	SRR21617161	Haemaphysalis concinna	field -- flagging at various sites	2021	China:Heilongjiang:Songling	50.91 N 124.41 E	Male	14	Extensive diversity of RNA viruses in ticks revealed by metagenomics in northeastern China
PRJNA880639	SRR21617162	Dermacentor silvarum	cattle	2021	China:Jilin:Shulan	44.37 N 127.07 E	Female	100	Extensive diversity of RNA viruses in ticks revealed by metagenomics in northeastern China
PRJNA880639	SRR21617163	Dermacentor silvarum	cattle	2021	China:Jilin:Shulan	44.37 N 127.07 E	Male	100	Extensive diversity of RNA viruses in ticks revealed by metagenomics in northeastern China
PRJNA880639	SRR21617164	Dermacentor silvarum	cattle	2021	China:Jilin:Shulan	44.37 N 127.07 E	Female	100	Extensive diversity of RNA viruses in ticks revealed by metagenomics in northeastern China
PRJNA880639	SRR21617165	Ixodes persulcatus	field -- flagging at various sites	2021	China:Heilongjiang:Fangzheng	45.75 N 128.78 E	Male	100	Extensive diversity of RNA viruses in ticks revealed by metagenomics in northeastern China
PRJNA880639	SRR21617166	Ixodes persulcatus	field -- flagging at various sites	2021	China:Heilongjiang:Fangzheng	45.75 N 128.78 E	Female	100	Extensive diversity of RNA viruses in ticks revealed by metagenomics in northeastern China
PRJNA880639	SRR21617167	Haemaphysalis concinna	field -- flagging at various sites	2021	China:Heilongjiang:Fangzheng	45.75 N 128.78 E	NA	100	Extensive diversity of RNA viruses in ticks revealed by metagenomics in northeastern China
PRJNA880639	SRR21617172	Ixodes persulcatus	field -- flagging at various sites	2021	China:Heilongjiang:Mudangjiang	44.14 N 128.64 E	NA	56	Extensive diversity of RNA viruses in ticks revealed by metagenomics in northeastern China
PRJNA880639	SRR21617183	Haemaphysalis concinna	field -- flagging at various sites	2021	China:Heilongjiang:Mudangjiang	44.14 N 128.64 E	NA	100	Extensive diversity of RNA viruses in ticks revealed by metagenomics in northeastern China
PRJNA880639	SRR21617184	Haemaphysalis japonica	field -- flagging at various sites	2021	China:Jilin:Ji'an	41.41 N 126.46 E	NA	100	Extensive diversity of RNA viruses in ticks revealed by metagenomics in northeastern China
PRJNA639641	SRR12020150	Ixodes persulcatus	Homo sapiens	2016	China:Heilongjiang:Mudangjiang	NA	NA	10	Virome and Blood Meal-Associated Host Responses in Ixodes persulcatus Naturally Fed on Patients
PRJNA639641	SRR12020151	Ixodes persulcatus	Homo sapiens	2016	China:Heilongjiang:Mudangjiang	NA	NA	10	Virome and Blood Meal-Associated Host Responses in Ixodes persulcatus Naturally Fed on Patients
PRJNA639641	SRR12020152	Ixodes persulcatus	Homo sapiens	2016	China:Heilongjiang:Mudangjiang	NA	NA	10	Virome and Blood Meal-Associated Host Responses in Ixodes persulcatus Naturally Fed on Patients
PRJNA639641	SRR12020153	Ixodes persulcatus	Homo sapiens	2016	China:Heilongjiang:Mudangjiang	NA	NA	10	Virome and Blood Meal-Associated Host Responses in Ixodes persulcatus Naturally Fed on Patients
PRJNA639641	SRR12020154	Ixodes persulcatus	Homo sapiens	2016	China:Heilongjiang:Mudangjiang	NA	NA	10	Virome and Blood Meal-Associated Host Responses in Ixodes persulcatus Naturally Fed on Patients
PRJNA639641	SRR12020155	Ixodes persulcatus	Homo sapiens	2016	China:Heilongjiang:Mudangjiang	NA	NA	10	Virome and Blood Meal-Associated Host Responses in Ixodes persulcatus Naturally Fed on Patients
PRJNA639641	SRR12020156	Ixodes persulcatus	Homo sapiens	2016	China:Heilongjiang:Mudangjiang	NA	NA	10	Virome and Blood Meal-Associated Host Responses in Ixodes persulcatus Naturally Fed on Patients
PRJNA639641	SRR12020157	Ixodes persulcatus	Homo sapiens	2016	China:Heilongjiang:Mudangjiang	NA	NA	10	Virome and Blood Meal-Associated Host Responses in Ixodes persulcatus Naturally Fed on Patients
PRJNA639641	SRR12020158	Ixodes persulcatus	Homo sapiens	2016	China:Heilongjiang:Mudangjiang	NA	NA	10	Virome and Blood Meal-Associated Host Responses in Ixodes persulcatus Naturally Fed on Patients
CRA011751	CRR818373	Ixodes persulcatus	environmental	2017	China:Jilin:Tonghua	41.72 N 125.93 E	NA	20	Metatranscriptomics Reveals the RNA Virome of Ixodes Persulcatus in the China–North Korea Border, 2017
CRA011751	CRR818372	Ixodes persulcatus	environmental	2017	China:Jilin:Tonghua	41.72 N 125.93 E	NA	27	Metatranscriptomics Reveals the RNA Virome of Ixodes Persulcatus in the China–North Korea Border, 2017
CRA011751	CRR818371	Ixodes persulcatus	environmental	2017	China:Jilin:Tonghua	41.72 N 125.93 E	NA	40	Metatranscriptomics Reveals the RNA Virome of Ixodes Persulcatus in the China–North Korea Border, 2017
CRA011751	CRR818370	Ixodes persulcatus	environmental	2017	China:Jilin:Tonghua	41.72 N 125.93 E	NA	30	Metatranscriptomics Reveals the RNA Virome of Ixodes Persulcatus in the China–North Korea Border, 2017
CRA011751	CRR818369	Ixodes persulcatus	environmental	2017	China:Jilin:Tonghua	41.72 N 125.93 E	NA	41	Metatranscriptomics Reveals the RNA Virome of Ixodes Persulcatus in the China–North Korea Border, 2017
CRA011751	CRR818368	Ixodes persulcatus	environmental	2017	China:Jilin:Yanbian	42.90 N 129.51 E	NA	53	Metatranscriptomics Reveals the RNA Virome of Ixodes Persulcatus in the China–North Korea Border, 2017
CRA011751	CRR818367	Ixodes persulcatus	environmental	2017	China:Jilin:Yanbian	42.90 N 129.51 E	NA	41	Metatranscriptomics Reveals the RNA Virome of Ixodes Persulcatus in the China–North Korea Border, 2017
CRA011751	CRR818366	Ixodes persulcatus	environmental	2017	China:Jilin:Yanbian	42.90 N 129.51 E	NA	37	Metatranscriptomics Reveals the RNA Virome of Ixodes Persulcatus in the China–North Korea Border, 2017
CRA011751	CRR818365	Ixodes persulcatus	environmental	2017	China:Jilin:Yanbian	42.90 N 129.51 E	NA	50	Metatranscriptomics Reveals the RNA Virome of Ixodes Persulcatus in the China–North Korea Border, 2017
CRA011751	CRR818364	Ixodes persulcatus	environmental	2017	China:Jilin:Yanbian	42.90 N 129.51 E	NA	40	Metatranscriptomics Reveals the RNA Virome of Ixodes Persulcatus in the China–North Korea Border, 2017
CRA011751	CRR818363	Ixodes persulcatus	environmental	2017	China:Jilin:Yanbian	42.90 N 129.51 E	NA	28	Metatranscriptomics Reveals the RNA Virome of Ixodes Persulcatus in the China–North Korea Border, 2017
CRA011751	CRR818362	Ixodes persulcatus	environmental	2017	China:Jilin:Yanbian	42.90 N 129.51 E	NA	48	Metatranscriptomics Reveals the RNA Virome of Ixodes Persulcatus in the China–North Korea Border, 2017
CRA011751	CRR818361	Ixodes persulcatus	environmental	2017	China:Jilin:Baishan	41.94 N 126.42 E	NA	75	Metatranscriptomics Reveals the RNA Virome of Ixodes Persulcatus in the China–North Korea Border, 2017
CRA011751	CRR818360	Ixodes persulcatus	environmental	2017	China:Jilin:Baishan	41.94 N 126.42 E	NA	42	Metatranscriptomics Reveals the RNA Virome of Ixodes Persulcatus in the China–North Korea Border, 2017
CRA011751	CRR818359	Ixodes persulcatus	environmental	2017	China:Jilin:Baishan	41.94 N 126.42 E	NA	50	Metatranscriptomics Reveals the RNA Virome of Ixodes Persulcatus in the China–North Korea Border, 2017
CRA011751	CRR818358	Ixodes persulcatus	environmental	2017	China:Jilin:Baishan	41.94 N 126.42 E	NA	43	Metatranscriptomics Reveals the RNA Virome of Ixodes Persulcatus in the China–North Korea Border, 2017
CRA011751	CRR818357	Ixodes persulcatus	environmental	2017	China:Jilin:Baishan	41.94 N 126.42 E	NA	39	Metatranscriptomics Reveals the RNA Virome of Ixodes Persulcatus in the China–North Korea Border, 2017
CRA011751	CRR818356	Ixodes persulcatus	environmental	2017	China:Jilin:Baishan	41.94 N 126.42 E	NA	39	Metatranscriptomics Reveals the RNA Virome of Ixodes Persulcatus in the China–North Korea Border, 2017
CRA011751	CRR818355	Ixodes persulcatus	environmental	2017	China:Jilin:Baishan	41.94 N 126.42 E	NA	39	Metatranscriptomics Reveals the RNA Virome of Ixodes Persulcatus in the China–North Korea Border, 2017
CRA011751	CRR818354	Ixodes persulcatus	environmental	2017	China:Jilin:Baishan	41.94 N 126.42 E	NA	50	Metatranscriptomics Reveals the RNA Virome of Ixodes Persulcatus in the China–North Korea Border, 2017
CRA011751	CRR818353	Ixodes persulcatus	environmental	2017	China:Jilin:Baishan	41.94 N 126.42 E	NA	50	Metatranscriptomics Reveals the RNA Virome of Ixodes Persulcatus in the China–North Korea Border, 2017
CRA011751	CRR818352	Ixodes persulcatus	environmental	2017	China:Jilin:Baishan	41.94 N 126.42 E	NA	50	Metatranscriptomics Reveals the RNA Virome of Ixodes Persulcatus in the China–North Korea Border, 2017
CRA011751	CRR818351	Ixodes persulcatus	environmental	2017	China:Jilin:Baishan	41.94 N 126.42 E	NA	46	Metatranscriptomics Reveals the RNA Virome of Ixodes Persulcatus in the China–North Korea Border, 2017
CRA011751	CRR818350	Ixodes persulcatus	environmental	2017	China:Jilin:Baishan	41.94 N 126.42 E	NA	43	Metatranscriptomics Reveals the RNA Virome of Ixodes Persulcatus in the China–North Korea Border, 2017
CRA011751	CRR818349	Ixodes persulcatus	environmental	2017	China:Jilin:Baishan	41.94 N 126.42 E	NA	50	Metatranscriptomics Reveals the RNA Virome of Ixodes Persulcatus in the China–North Korea Border, 2017
CRA011751	CRR818348	Ixodes persulcatus	environmental	2017	China:Jilin:Baishan	41.94 N 126.42 E	NA	50	Metatranscriptomics Reveals the RNA Virome of Ixodes Persulcatus in the China–North Korea Border, 2017
CRA011751	CRR818347	Ixodes persulcatus	environmental	2017	China:Jilin:Baishan	41.94 N 126.42 E	NA	20	Metatranscriptomics Reveals the RNA Virome of Ixodes Persulcatus in the China–North Korea Border, 2017
CRA011751	CRR818346	Ixodes persulcatus	environmental	2017	China:Jilin:Baishan	41.94 N 126.42 E	NA	39	Metatranscriptomics Reveals the RNA Virome of Ixodes Persulcatus in the China–North Korea Border, 2017
CRA011751	CRR818345	Ixodes persulcatus	environmental	2017	China:Jilin:Baishan	41.94 N 126.42 E	NA	29	Metatranscriptomics Reveals the RNA Virome of Ixodes Persulcatus in the China–North Korea Border, 2017
CRA011751	CRR818344	Ixodes persulcatus	environmental	2017	China:Jilin:Baishan	41.94 N 126.42 E	NA	50	Metatranscriptomics Reveals the RNA Virome of Ixodes Persulcatus in the China–North Korea Border, 2017
CRA011751	CRR818343	Ixodes persulcatus	environmental	2017	China:Jilin:Baishan	41.94 N 126.42 E	NA	50	Metatranscriptomics Reveals the RNA Virome of Ixodes Persulcatus in the China–North Korea Border, 2017
CRA011751	CRR818342	Ixodes persulcatus	environmental	2017	China:Jilin:Baishan	41.94 N 126.42 E	NA	43	Metatranscriptomics Reveals the RNA Virome of Ixodes Persulcatus in the China–North Korea Border, 2017
CRA011751	CRR818341	Ixodes persulcatus	environmental	2017	China:Jilin:Baishan	41.94 N 126.42 E	NA	46	Metatranscriptomics Reveals the RNA Virome of Ixodes Persulcatus in the China–North Korea Border, 2017
CRA011751	CRR818340	Ixodes persulcatus	environmental	2017	China:Jilin:Yanbian	42.90 N 129.51 E	NA	10	Metatranscriptomics Reveals the RNA Virome of Ixodes Persulcatus in the China–North Korea Border, 2017
CRA011751	CRR818339	Ixodes persulcatus	environmental	2017	China:Jilin:Yanbian	42.90 N 129.51 E	NA	19	Metatranscriptomics Reveals the RNA Virome of Ixodes Persulcatus in the China–North Korea Border, 2017
CRA011751	CRR818338	Ixodes persulcatus	environmental	2017	China:Jilin:Yanbian	42.90 N 129.51 E	NA	23	Metatranscriptomics Reveals the RNA Virome of Ixodes Persulcatus in the China–North Korea Border, 2017
CRA011751	CRR818337	Ixodes persulcatus	environmental	2017	China:Jilin:Yanbian	42.90 N 129.51 E	NA	41	Metatranscriptomics Reveals the RNA Virome of Ixodes Persulcatus in the China–North Korea Border, 2017
CRA011751	CRR818336	Ixodes persulcatus	environmental	2017	China:Jilin:Yanbian	42.90 N 129.51 E	NA	40	Metatranscriptomics Reveals the RNA Virome of Ixodes Persulcatus in the China–North Korea Border, 2017
CRA011751	CRR818335	Ixodes persulcatus	environmental	2017	China:Jilin:Yanbian	42.90 N 129.51 E	NA	28	Metatranscriptomics Reveals the RNA Virome of Ixodes Persulcatus in the China–North Korea Border, 2017
CRA011751	CRR818334	Ixodes persulcatus	environmental	2017	China:Jilin:Yanbian	42.90 N 129.51 E	NA	25	Metatranscriptomics Reveals the RNA Virome of Ixodes Persulcatus in the China–North Korea Border, 2017
CRA011751	CRR818333	Ixodes persulcatus	environmental	2017	China:Jilin:Yanbian	42.90 N 129.51 E	NA	43	Metatranscriptomics Reveals the RNA Virome of Ixodes Persulcatus in the China–North Korea Border, 2017
CRA011751	CRR818332	Ixodes persulcatus	environmental	2017	China:Jilin:Yanbian	42.90 N 129.51 E	NA	50	Metatranscriptomics Reveals the RNA Virome of Ixodes Persulcatus in the China–North Korea Border, 2017
CRA011751	CRR818331	Ixodes persulcatus	environmental	2017	China:Jilin:Yanbian	42.90 N 129.51 E	NA	43	Metatranscriptomics Reveals the RNA Virome of Ixodes Persulcatus in the China–North Korea Border, 2017
CRA011751	CRR818330	Ixodes persulcatus	environmental	2017	China:Jilin:Yanbian	42.90 N 129.51 E	NA	49	Metatranscriptomics Reveals the RNA Virome of Ixodes Persulcatus in the China–North Korea Border, 2017
CRA011751	CRR818329	Ixodes persulcatus	environmental	2017	China:Jilin:Yanbian	42.90 N 129.51 E	NA	46	Metatranscriptomics Reveals the RNA Virome of Ixodes Persulcatus in the China–North Korea Border, 2017
CRA011751	CRR818328	Ixodes persulcatus	environmental	2017	China:Jilin:Tonghua	41.72 N 125.93 E	NA	27	Metatranscriptomics Reveals the RNA Virome of Ixodes Persulcatus in the China–North Korea Border, 2017
CRA011751	CRR818327	Ixodes persulcatus	environmental	2017	China:Jilin:Tonghua	41.72 N 125.93 E	NA	40	Metatranscriptomics Reveals the RNA Virome of Ixodes Persulcatus in the China–North Korea Border, 2017
CRA011751	CRR818326	Ixodes persulcatus	environmental	2017	China:Jilin:Tonghua	41.72 N 125.93 E	NA	47	Metatranscriptomics Reveals the RNA Virome of Ixodes Persulcatus in the China–North Korea Border, 2017
CRA011751	CRR818325	Ixodes persulcatus	environmental	2017	China:Jilin:Tonghua	41.72 N 125.93 E	NA	35	Metatranscriptomics Reveals the RNA Virome of Ixodes Persulcatus in the China–North Korea Border, 2017
CRA011751	CRR818324	Ixodes persulcatus	environmental	2017	China:Jilin:Tonghua	41.72 N 125.93 E	NA	31	Metatranscriptomics Reveals the RNA Virome of Ixodes Persulcatus in the China–North Korea Border, 2017
CRA011751	CRR818323	Ixodes persulcatus	environmental	2017	China:Jilin:Tonghua	41.72 N 125.93 E	NA	44	Metatranscriptomics Reveals the RNA Virome of Ixodes Persulcatus in the China–North Korea Border, 2017
CRA011751	CRR818322	Ixodes persulcatus	environmental	2017	China:Jilin:Tonghua	41.72 N 125.93 E	NA	38	Metatranscriptomics Reveals the RNA Virome of Ixodes Persulcatus in the China–North Korea Border, 2017
CRA011751	CRR818321	Ixodes persulcatus	environmental	2017	China:Jilin:Tonghua	41.72 N 125.93 E	NA	50	Metatranscriptomics Reveals the RNA Virome of Ixodes Persulcatus in the China–North Korea Border, 2017
PRJNA680460	SRR13164785	Haemaphysalis longicornis	grassland	2015	China:Liaoning:Dalian	38.93 N 121.45 E	NA	50	Virome analysis of ticks in a forest region of Liaoning, China: characterization of a novel hepe-like virus sequence
PRJNA680460	SRR13164787	Haemaphysalis longicornis	grassland	2015	China:Liaoning:Dalian	38.93 N 121.45 E	NA	50	Virome analysis of ticks in a forest region of Liaoning, China: characterization of a novel hepe-like virus sequence
PRJNA680460	SRR13164789	Haemaphysalis longicornis	grassland	2015	China:Liaoning:Dalian	38.93 N 121.45 E	NA	50	Virome analysis of ticks in a forest region of Liaoning, China: characterization of a novel hepe-like virus sequence
PRJNA680460	SRR13164897	Haemaphysalis longicornis	grassland	2015	China:Liaoning:Dalian	38.93 N 121.45 E	NA	50	Virome analysis of ticks in a forest region of Liaoning, China: characterization of a novel hepe-like virus sequence
PRJNA680460	SRR13164899	Haemaphysalis longicornis	grassland	2015	China:Liaoning:Dalian	38.93 N 121.45 E	NA	50	Virome analysis of ticks in a forest region of Liaoning, China: characterization of a novel hepe-like virus sequence
PRJNA680460	SRR13164901	Haemaphysalis longicornis	grassland	2015	China:Liaoning:Dalian	38.93 N 121.45 E	NA	50	Virome analysis of ticks in a forest region of Liaoning, China: characterization of a novel hepe-like virus sequence
PRJNA819490	SRR18473714	Dermacentor silvarum	cattle	2020	China:Neimenggu:Hulunbeier:Zhalantun	47.31 N 121.24 E	Male	5	Diversity of RNA viruses of three dominant tick species in North China/Viral Diversity and Differential Expression of E3 Ubiquitin Ligases in Three Common Tick Species Based on High-Throughput Sequencing
PRJNA819490	SRR18473713	Dermacentor silvarum	cattle	2020	China:Neimenggu:Hulunbeier:Zhalantun	47.31 N 121.24 E	Female	5	Diversity of RNA viruses of three dominant tick species in North China/Viral Diversity and Differential Expression of E3 Ubiquitin Ligases in Three Common Tick Species Based on High-Throughput Sequencing
PRJNA819490	SRR18473708	Dermacentor silvarum	mising	2020	China:Neimenggu:Hulunbeier:Zhalantun	47.31 N 121.24 E	Female	5	Diversity of RNA viruses of three dominant tick species in North China/Viral Diversity and Differential Expression of E3 Ubiquitin Ligases in Three Common Tick Species Based on High-Throughput Sequencing
PRJNA819490	SRR18473711	Ixodes persulcatus	mising	2020	China:Heilongjiang:Mudangjiang	44.92 N 129.52 E	Female	10	Diversity of RNA viruses of three dominant tick species in North China/Viral Diversity and Differential Expression of E3 Ubiquitin Ligases in Three Common Tick Species Based on High-Throughput Sequencing
PRJNA819490	SRR18473707	Ixodes persulcatus	cattle	2020	China:Heilongjiang:Mudangjiang	44.92 N 129.52 E	Female	10	Diversity of RNA viruses of three dominant tick species in North China/Viral Diversity and Differential Expression of E3 Ubiquitin Ligases in Three Common Tick Species Based on High-Throughput Sequencing
PRJNA819490	SRR18473712	Ixodes persulcatus	mising	2020	China:Heilongjiang:Mudangjiang	44.92 N 129.52 E	Male	16	Diversity of RNA viruses of three dominant tick species in North China/Viral Diversity and Differential Expression of E3 Ubiquitin Ligases in Three Common Tick Species Based on High-Throughput Sequencing
PRJNA819490	SRR18473710	Haemaphysalis concinna	mising	2020	China:Heilongjiang:Mudangjiang	44.92 N 129.52 E	Male	16	Diversity of RNA viruses of three dominant tick species in North China/Viral Diversity and Differential Expression of E3 Ubiquitin Ligases in Three Common Tick Species Based on High-Throughput Sequencing
PRJNA819490	SRR18473709	Haemaphysalis concinna	mising	2020	China:Heilongjiang:Mudangjiang	44.92 N 129.52 E	Female	10	Diversity of RNA viruses of three dominant tick species in North China/Viral Diversity and Differential Expression of E3 Ubiquitin Ligases in Three Common Tick Species Based on High-Throughput Sequencing
PRJNA875608	SRR21429707	Ixodes persulcatus	environmental	2021	China:Neimenggu:Hulunbeier:伊列克德	48.85 N 121.60 E	Male	20	Viral Spectrum Baseline in Ticks from Hainan and Inner Mongolia and Development of a Multiplex Assay for Tick-Borne Pathogens
PRJNA875608	SRR21429703	Ixodes persulcatus	environmental	2021	China:Neimenggu:Hulunbeier:伊列克德	48.85 N 121.60 E	Male	20	Viral Spectrum Baseline in Ticks from Hainan and Inner Mongolia and Development of a Multiplex Assay for Tick-Borne Pathogens
PRJNA875608	SRR21429697	Haemaphysalis longicornis	environmental	2021	China:Neimenggu:Hulunbeier:伊列克德	48.85 N 121.60 E	Male	20	Viral Spectrum Baseline in Ticks from Hainan and Inner Mongolia and Development of a Multiplex Assay for Tick-Borne Pathogens
PRJNA875608	SRR21429705	Haemaphysalis longicornis	environmental	2021	China:Neimenggu:Hulunbeier:伊列克德	48.85 N 121.60 E	Male	20	Viral Spectrum Baseline in Ticks from Hainan and Inner Mongolia and Development of a Multiplex Assay for Tick-Borne Pathogens
PRJNA875608	SRR21429701	Dermacentor silvarum	environmental	2021	China:Neimenggu:Hulunbeier	48.87 E 121.25 E	Male	10	Viral Spectrum Baseline in Ticks from Hainan and Inner Mongolia and Development of a Multiplex Assay for Tick-Borne Pathogens
PRJNA875608	SRR21429699	Dermacentor silvarum	environmental	2021	China:Neimenggu:Hulunbeier	49.48 E 121.32 E	Male	10	Viral Spectrum Baseline in Ticks from Hainan and Inner Mongolia and Development of a Multiplex Assay for Tick-Borne Pathogens
PRJNA875608	SRR21429706	Ixodes persulcatus	environmental	2021	China:Neimenggu:Hulunbeier:伊列克德	48.85 N 121.60 E	Female	20	Viral Spectrum Baseline in Ticks from Hainan and Inner Mongolia and Development of a Multiplex Assay for Tick-Borne Pathogens
PRJNA875608	SRR21429702	Ixodes persulcatus	environmental	2021	China:Neimenggu:Hulunbeier:伊列克德	48.85 N 121.60 E	Female	20	Viral Spectrum Baseline in Ticks from Hainan and Inner Mongolia and Development of a Multiplex Assay for Tick-Borne Pathogens
PRJNA875608	SRR21429696	Haemaphysalis longicornis	environmental	2021	China:Neimenggu:Hulunbeier:伊列克德	48.85 N 121.60 E	Female	20	Viral Spectrum Baseline in Ticks from Hainan and Inner Mongolia and Development of a Multiplex Assay for Tick-Borne Pathogens
PRJNA875608	SRR21429704	Haemaphysalis longicornis	environmental	2021	China:Neimenggu:Hulunbeier:伊列克德	48.85 N 121.60 E	Female	20	Viral Spectrum Baseline in Ticks from Hainan and Inner Mongolia and Development of a Multiplex Assay for Tick-Borne Pathogens
PRJNA875608	SRR21429700	Dermacentor silvarum	environmental	2021	China:Neimenggu:Hulunbeier	48.87 E 121.25 E	Female	10	Viral Spectrum Baseline in Ticks from Hainan and Inner Mongolia and Development of a Multiplex Assay for Tick-Borne Pathogens
PRJNA875608	SRR21429698	Dermacentor silvarum	environmental	2021	China:Neimenggu:Hulunbeier	49.48 E 121.32 E	Female	10	Viral Spectrum Baseline in Ticks from Hainan and Inner Mongolia and Development of a Multiplex Assay for Tick-Borne Pathogens
